# Supplementary material
Source: PubMed Central journal article supplement (PMC2693465)
Supplement: NIHMS102980-supplement-supplement_1.pdf [file NIHMS102980-supplement-supplement_1.pdf]

## Supplementary Material

Supplementary Figure 1. RT-PCR analysis of cyclooxygenase pathway genes

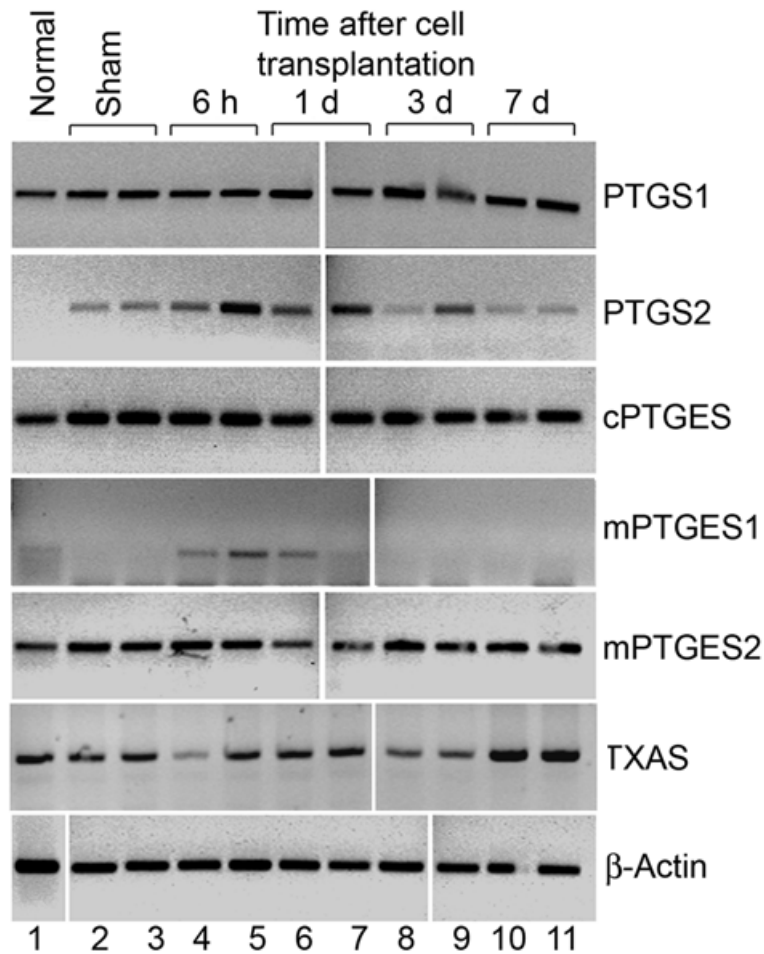

RT-PCR showing changes in the expression of several genes in the cyclooxygenase pathways as indicated. Lane 1, unmanipulated normal rat liver; lanes 2, 3, sham-operated livers after 6 h; lanes 4-11, livers from animals 6 h, 1 d, 3 d, and 7 d after hepatocyte transplantation via the spleen.

**Supplementary Figure 2. Immunohistochemical studies of PTGS2 expression**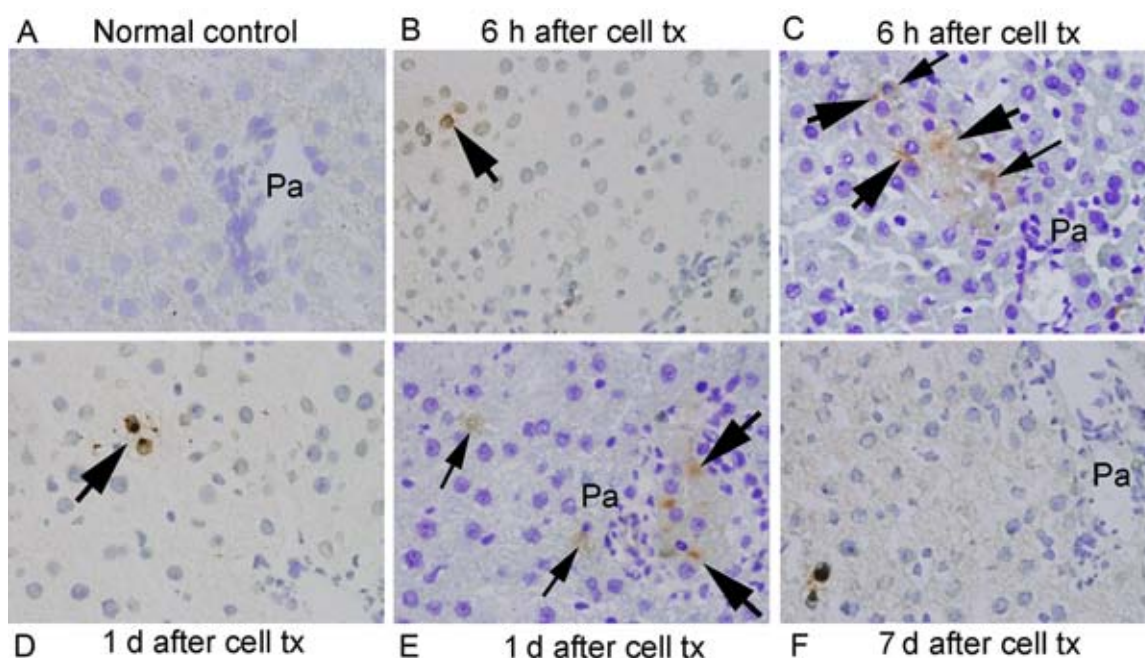

PTGS2 was not expressed in the normal liver (A). Although PTGS2 was expressed after cell transplantation (arrows in B-F), the magnitude of PTGS2 expression was less than that of PTGS1. Combined staining for DPPIV and PTGS2 (C, E) showed that transplanted cells (thick arrows) and PTGS2 (thin arrows) were often in proximity to one another. Orig. mag. x400; toluidine blue counterstain.

**Supplementary Figure 3. Immunohistochemical staining for PTGS1 and PTGS2 in  
sham-treated rats**

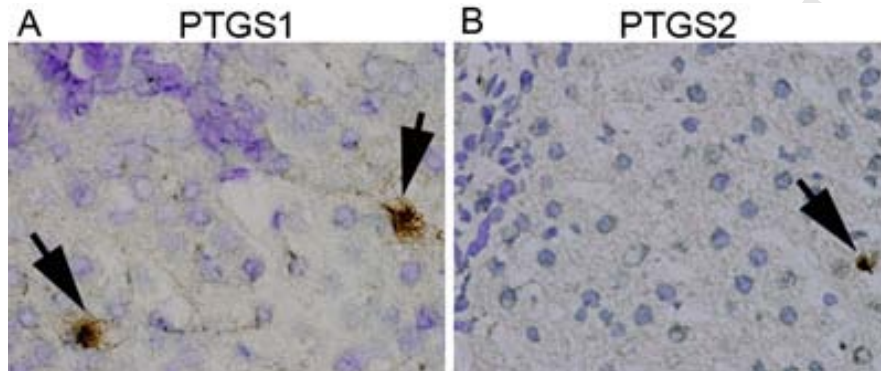

Shown is presence of occasional liver cells with expression of PTGS1 (A), as well as PTGS2 (B) (arrows) in animals subjected to sham treatment 6 h previously. Orig. mag. x400; toluidine blue counterstain.

**Supplementary Figure 4. Improvements in cell engraftment in animals treated with PTGS1 and PTGS2 blockers**

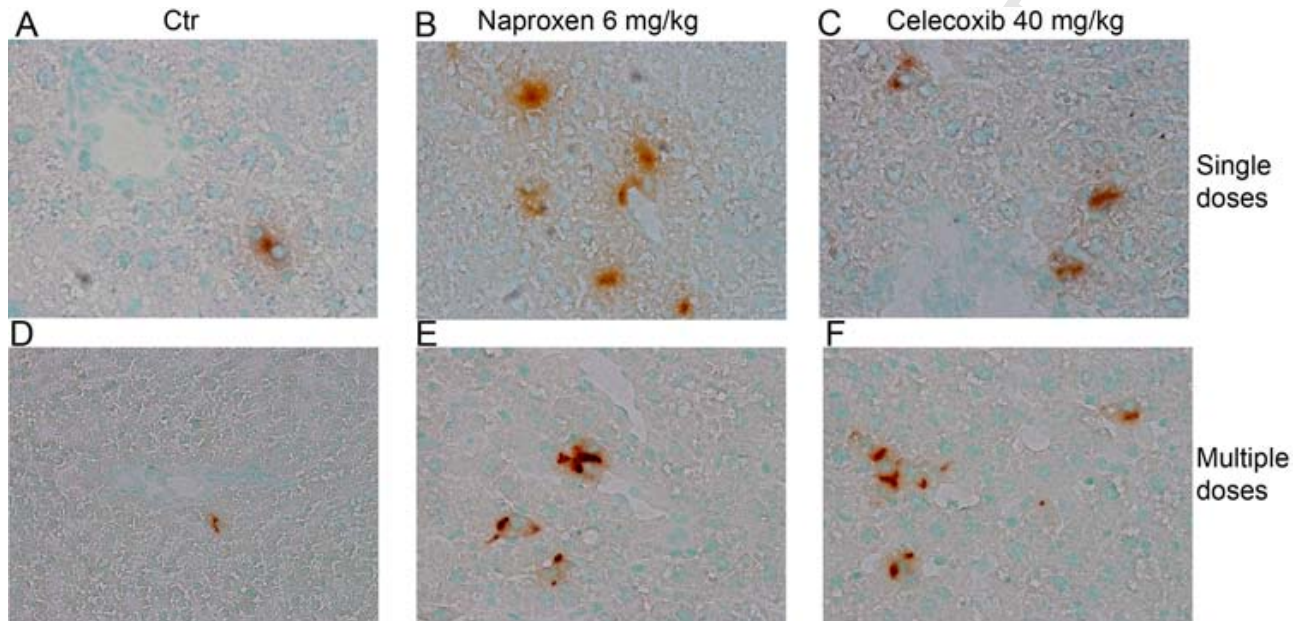

Cell engraftment in control rats (A, D), and rats treated with single doses of 6 mg/kg naproxen or 40 mg/kg celecoxib (B, C), and rats treated with 8 doses each of naproxen and celecoxib (E, F). Orig. mag. x400; methylgreen counterstain.

**Supplementary Figure 5. Hepatic GGT expression after cell transplantation**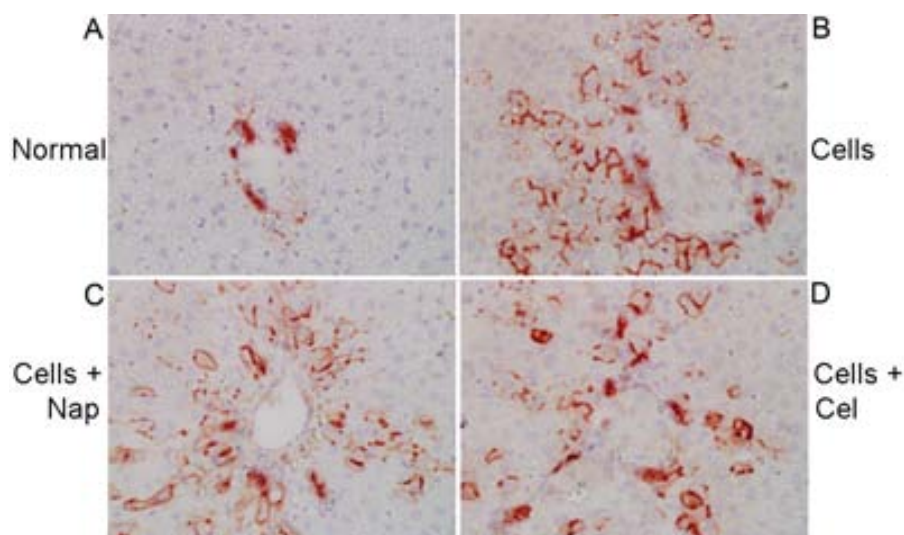

(A) Shows normal control liver with GGT expression restricted to bile ducts (red color). (B) GGT expression in native hepatocytes in the periportal region 6 h after cell transplantation, which was unchanged 6 h after cell transplantation in animals pretreated with 6 mg/kg naproxen (C) or 40 mg/kg celecoxib (D), indicating that GGT expression was unaffected by blockade of PTGS1 and PTGS2. Orig. mag. x400; hematoxylin counterstain.



**Supplementary Figure 6. Accumulation of myeloperoxidase-positive neutrophils in liver 6 h after cell transplantation**

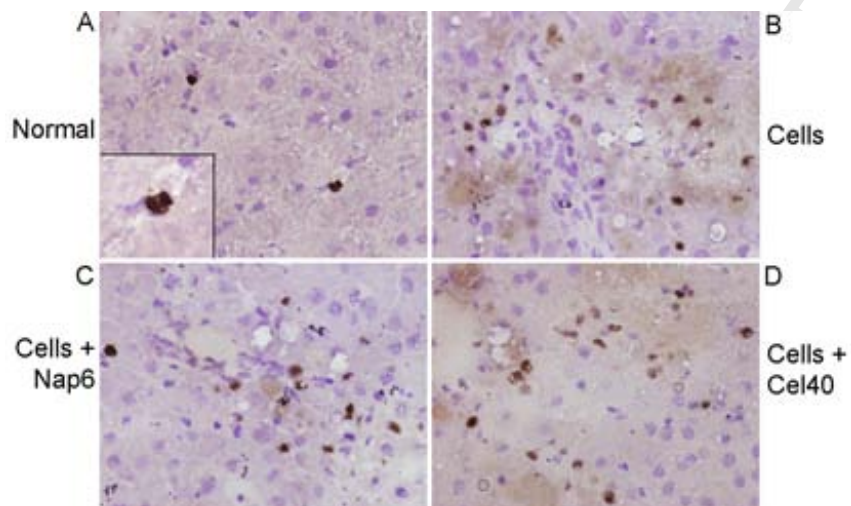

(A) Shows scattered neutrophils with myeloperoxidase staining in untreated control rat (inset, magnified view), (B) rat after cell transplantation alone with more neutrophils, (C and D), rats treated with 6 mg/kg naproxen (C) and 40 mg/kg celecoxib (D) followed by cell transplantation continued to show neutrophil accumulation. Orig. mag. x400; hematoxylin counterstain,

**Supplementary Figure 7. Kupffer cells with carbon incorporation 6 h after cell transplantation**

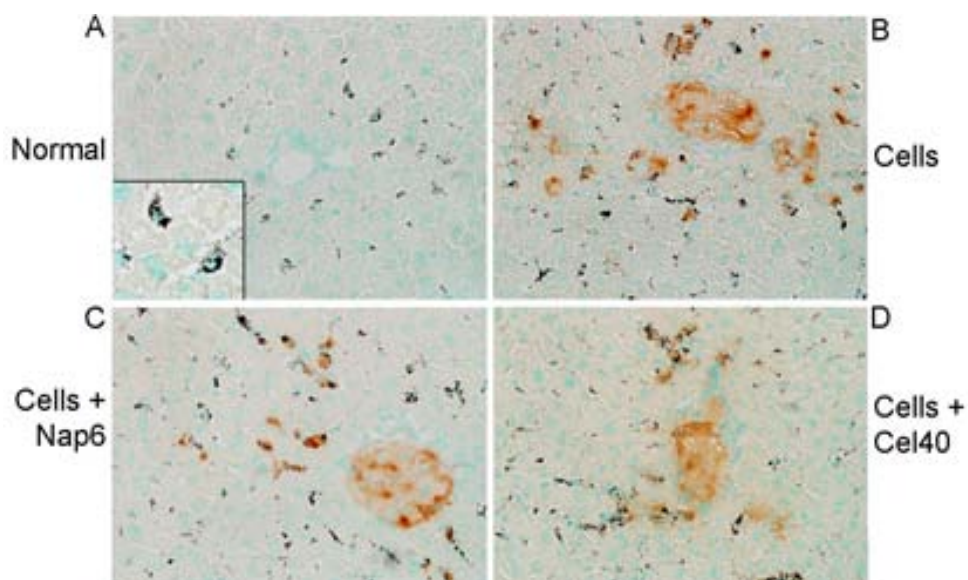

Livers from animals with carbon-containing Kupffer cells (black particles) and DPPIV-positive transplanted cells (red color) are shown. (A) Untreated control rat with inset showing magnified view of Kupffer cells with carbon, (B) rat after cell transplantation alone, (C and D) rats treated with 6 mg/kg naproxen or 40 mg/kg celecoxib before cells. Orig. mag. x400; methylgreen counterstain.

## Supplementary Table 1

>2-Fold mean changes in gene expression of chemokines, cytokines and receptors compared with normal liver (n=3 animals each)

| Genes                  | Cell transplantation alone | Cell transplantation after 6 mg/kg naproxen | Cell transplantation after 40 mg/kg celecoxib |
|------------------------|----------------------------|---------------------------------------------|-----------------------------------------------|
| <b>Ccl12_predicted</b> | 20.78                      | 27.91                                       | 21.26                                         |
| <b>Ccl17</b>           | 16.11                      | 13.04                                       | 10.26                                         |
| <b>Ccl2</b>            | 69.26                      | 97.82                                       | 99.17                                         |
| <b>Ccl20</b>           | 13.00                      | 36.54                                       | 8.88                                          |
| <b>Ccl3</b>            | 8.70                       | 10.47                                       | 7.79                                          |
| <b>Ccl4</b>            | 7.51                       | 9.78                                        | 6.49                                          |
| <b>Ccl7</b>            | 64.94                      | 105.75                                      | 90.32                                         |
| <b>Ccr1</b>            | 7.32                       | 10.01                                       | 7.49                                          |
| <b>Ccr2</b>            | 4.37                       | 4.11                                        | 1.54                                          |
| <b>Ccr12_predicted</b> | 2.59                       | 2.85                                        | 2.45                                          |
| <b>Cmkor1</b>          | 5.11                       | 5.78                                        | 5.41                                          |
| <b>Csf1</b>            | 2.27                       | 2.05                                        | 2.03                                          |
| <b>Csf2</b>            | 8.43                       | 9.76                                        | 8.43                                          |
| <b>Cxcl1</b>           | 76.99                      | 96.90                                       | 74.66                                         |
| <b>Cxcl10</b>          | 13.69                      | 17.31                                       | 8.32                                          |
| <b>Cxcl2</b>           | 153.26                     | 228.35                                      | 106.73                                        |
| <b>Cxcl4</b>           | 2.98                       | 2.48                                        | 2.68                                          |
| <b>Cxcl5</b>           | 3.14                       | 3.87                                        | 2.04                                          |
| <b>Cxcl7</b>           | 2.63                       | 1.96                                        | 1.84                                          |
| <b>Cxcr4</b>           | 2.79                       | 2.61                                        | 3.16                                          |
| <b>Ecgf1</b>           | -4.33                      | -5.40                                       | -4.60                                         |
| <b>Epo</b>             | 9.74                       | 15.36                                       | 18.79                                         |
| <b>Gpr77</b>           | -2.80                      | -2.28                                       | -2.16                                         |
| <b>Il8rb</b>           | 39.63                      | 39.81                                       | 24.03                                         |
| <b>Inhbb</b>           | 65.90                      | 75.77                                       | 54.49                                         |
| <b>Lif</b>             | 25.90                      | 26.50                                       | 19.09                                         |
| <b>Mmp7</b>            | 2.56                       | 2.22                                        | -1.08                                         |
| <b>Rgs3</b>            | -3.45                      | -4.76                                       | -4.29                                         |
| <b>Slit2</b>           | -3.01                      | -2.47                                       | -5.38                                         |
| <b>Tlr2</b>            | 2.76                       | 3.58                                        | 2.30                                          |
| <b>Tnf</b>             | 7.90                       | 11.33                                       | 8.25                                          |
| <b>Tnfrsf1a</b>        | 2.18                       | 2.01                                        | 2.11                                          |
| <b>Trem1_predicted</b> | 11.56                      | 10.66                                       | 9.04                                          |
